# Supplementary material for: Surgical Survival Benefits With Different Metastatic Patterns for Stage IV Extrathoracic Metastatic Non-Small Cell Lung Cancer: A SEER-Based Study
Source: PubMed Central journal article supplement — Technol Cancer Res Treat. 2021 Sep 9;20:15330338211033064. doi: 10.1177/15330338211033064 (PMC8442485; doi:10.1177/15330338211033064), 2021-09-09
Supplement: sj-pdf-1-tct-10.1177_15330338211033064.pdf [file sj-pdf-1-tct-10.1177_15330338211033064.pdf]

## Supporting Information

**Figure 1S.** The distribution of metastatic patterns in stage IV extrathoracic metastatic non-small cell lung cancer patients.

Table S1 The Early Mortality of Surgery and Non-surgery Group

|                        |          | No. of Patients (%)    |                     | P-value |
|------------------------|----------|------------------------|---------------------|---------|
|                        |          | Non-surgery group      | Surgery group       |         |
| Total mortality        | 1 month  | 4868/32538<br>(14.96)  | 65/1074<br>(6.05)   | <0.001  |
|                        | 3 months | 11616/32538<br>(35.70) | 184/1074<br>(17.13) | <0.001  |
|                        | 6 months | 17323/32538<br>(53.24) | 317/1074<br>(29.52) | <0.001  |
| Cancer-cause mortality | 1 month  | 4554/32538<br>(14.00)  | 58/1074<br>(5.40)   | <0.001  |
|                        | 3 months | 10912/32538<br>(33.54) | 169/1074<br>(15.74) | <0.001  |
|                        | 6 months | 16433/32538<br>(50.50) | 294/1074<br>(27.37) | <0.001  |

Table S2 The Percentage of Unknown Data

| Characteristic | Unknown cases | Total cases | Percentage (%) |
|----------------|---------------|-------------|----------------|
| Race           | 51            | 33612       | 0.15           |
| Marital        | 1240          | 33612       | 3.69           |
| Grade          | 19456         | 33612       | 57.88          |

Table S3 Patient Characteristics after Multiple Imputation for Unknown Data

| Characteristic     | No. of Patients (%)             |                             | P-value |
|--------------------|---------------------------------|-----------------------------|---------|
|                    | No-surgery group<br>(N = 32538) | Surgery group<br>(N = 1074) |         |
| Race               |                                 |                             | 0.013   |
| White              | 25012(76.9)                     | 866(80.6)                   |         |
| Black              | 4339(13.3)                      | 125(11.6)                   |         |
| Other <sup>†</sup> | 3187(9.8)                       | 83(7.7)                     |         |
| Marital            |                                 |                             | <0.001  |
| Single             | 5459(16.8)                      | 179(16.7)                   |         |
| Married            | 17773(54.6)                     | 655(61.0)                   |         |
| Other <sup>‡</sup> | 9306(28.6)                      | 240(22.3)                   |         |
| Grade              |                                 |                             | 0.001   |
| I                  | 1648(5.1)                       | 58(5.4)                     |         |

|     |             |           |
|-----|-------------|-----------|
| II  | 9645(29.6)  | 379(35.3) |
| III | 20496(63.0) | 611(56.9) |
| IV  | 749(2.3)    | 26(2.4)   |

†American Indian/AK Native, Asian/Pacific Islander

‡Widowed/ Divorced/ Separated/ Unmarried or Domestic Partner

Table S4 The patient cases in multiorgan metastasis subgroups.

| Metastatic pattern                            | No. of Patients   |               |       |
|-----------------------------------------------|-------------------|---------------|-------|
|                                               | Non-surgery group | Surgery group | Total |
| Multiorgan metastasis with distant lymph node | 3557              | 44            | 3601  |
| Bone+Liver+brain                              | 1068              | 6             | 1074  |
| Bone+liver                                    | 2260              | 24            | 2284  |
| Bone+Brain                                    | 2548              | 46            | 2594  |
| Brain+Liver                                   | 573               | 7             | 580   |
